# Supplementary material
Source: publisher figshare collection journal article supplement (https://sage.figshare.com/ndownloader/files/17619092)
Supplement: Supplementary file 1 [file 17619092]

Ameliorating Workplace Harassment among Direct Caregivers in Canada's Healthcare System:  
A theatre-based intervention.

Appendix A: Participant Demographics

| ID | Interviewed Participants Pseudonym | Occupation       | Years in Occupation | Type of Workplace | Years at Current Workplace | Gender |
|----|------------------------------------|------------------|---------------------|-------------------|----------------------------|--------|
| 1  | Rose                               | CCA <sup>1</sup> | 16                  | LTC               | 16                         | F      |
| 2  |                                    | CCA              | 14.6                | AC                | 1.5                        | M      |
| 3  |                                    | CCA              | 9.5                 | LTC               | 5                          | F      |
| 4  | Olive                              | CCA              | 6                   | LTC               | 6                          | F      |
| 5  |                                    | CCA              | 9.5                 | LTC               | 5                          | M      |
| 6  |                                    | CCA              | 5                   | LTC               | 4                          | M      |
| 7  |                                    | CCA              | 5                   | LTC               | 5                          | F      |
| 8  |                                    | CCA              | 4                   | LTC               | 4                          | M      |
| 9  |                                    | CCA              | 15                  | LTC               | 8.5                        | F      |
| 10 | Natalie                            | CCA              | 9                   | AC                | 6                          | F      |
| 11 |                                    | CCA              | 17                  | LTC               | 10                         | M      |
| 12 | Angela                             | CCA              | 15                  | HC                | 15                         | F      |
| 13 |                                    | CCA              | 14                  | LTC               | 10                         | F      |
| 14 |                                    | LPN <sup>2</sup> | 40                  | AC                | 1                          | F      |
| 15 | Mary                               | LPN              | 2                   | LTC               | 1.5                        | F      |
| 16 |                                    | LPN              | 30                  | LTC               | 1.5                        | F      |
| 17 |                                    | RN <sup>3</sup>  | 35                  | AC                | 25                         | F      |
| 18 | Barbara                            | RN               | 25                  | AC                | 15                         | F      |
| 19 |                                    | RN               | 31                  | Equip Mgr         | 9                          | F      |
| 20 | Carrie                             | RN               | 23                  | HC                | 13                         | F      |
| 21 |                                    | RN               | 0.24                | AC                | 0.24                       | F      |
| 22 | Pamela                             | RN               | 25                  | AC                | 25                         | F      |
| 23 |                                    | RN               | 32                  | AC                | 32                         | F      |
| 24 |                                    | RN               | 34                  | AC                | 34                         | F      |
| 25 | Liza                               | RN               | 33                  | LTC               | 33                         | F      |
| 26 | Debbie                             | RN               | 32                  | Education         | 10                         | F      |
| 27 | Jessica                            | RN               | 41                  | AC                | Retired                    | F      |

AC=Acute Care; HC=Home Care; LTC=Long Term Care

<sup>1</sup> As of 2016 there were 9,615 Nurse Aides, orderlies and patient service associates employed in Saskatchewan. 91.5% of workers in this category were female. Statistics Canada 2018, *Occupation - National Occupational Classification (NOC) 2016 (693A), class of worker (7A), labour force status (3), age (13A) and sex (3) for the labour force aged 15 years and over in private households of Canada, provinces and territories and census divisions, 2016 Census - 25% Sample data*, electronic data table, 2016 Census of Population, Statistics Canada Catalogue no 98-400-X2016291, last updated 20 February 2019, viewed 15 March 2019, <<https://www12.statcan.gc.ca/census-recensement/2016/dp-pd/dt-td/Rp-eng.cfm?LANG=E&APATH=3&DETAIL=0&DIM=0&FL=A&FREE=0&GC=0&GID=0&GK=0&GRP=1&PID=111>>

# Ameliorating Workplace Harassment among Direct Caregivers in Canada's Healthcare System: A theatre-based intervention.

## Appendix A: Participant Demographics

[850&PRID=10&PTYPE=109445&S=0&SHOWALL=0&SUB=0&Temporal=2017&THEME=124&VID=0&VNAMEE=&VNAMEF=>](#).

<sup>2</sup> As of 2016 there were 3,630 LPNs registered in Saskatchewan and 93.7% of these were female. Canadian Institute for Health Information 2018, *Regulated nurses, 2017*, electronic dataset, Health Workforce Database, viewed 15 March 2019, <<https://www.cihi.ca/en/regulated-nurses-2017>>.

<sup>3</sup> As of 2016 there were 10,893 RNs registered in Saskatchewan and 93.2% were female. Canadian Institute for Health Information 2018, *Regulated nurses, 2017*, electronic dataset, Health Workforce Database, viewed 15 March 2019, <<https://www.cihi.ca/en/regulated-nurses-2017>>.
